# Supplementary material for: Transgenerational Inheritance of Increased Fat Depot Size, Stem Cell Reprogramming, and Hepatic Steatosis Elicited by Prenatal Exposure to the Obesogen Tributyltin in Mice
Source: PubMed Central journal article supplement (PMC3621201; doi:10.1289/ehp.1205701), 2013-01-15
Supplement: ehp.1205701.s001.pdf [file ehp.1205701.s001.pdf]

## Supplemental Material

### **Transgenerational Inheritance of Increased Fat Depot Size, Stem Cell Reprogramming, and Hepatic Steatosis Elicited by Prenatal Obesogen Tributyltin in Mice**

Raquel Chamorro-García, Margaret Sahu, Rachelle J. Abbey, Jhyme Laude, Nhieu Pham and Bruce Blumberg<sup>2</sup>

#### **Table of Contents**

|                                                                                                                                                                  |   |
|------------------------------------------------------------------------------------------------------------------------------------------------------------------|---|
| Table S1. Number of litters per group .....                                                                                                                      | 2 |
| Table S2. Number of animals per group .....                                                                                                                      | 3 |
| Table S3. Primers used for QPCR analysis of gene expression .....                                                                                                | 4 |
| Figure S1. Hematoxylin and eosin staining of sections of epididymal, peri-renal, interscapular white and interscapular brown adipose tissues from F1 males. .... | 5 |
| Figure S2. Transgenerational effects of TBT on ovarian, perirenal, subscapular white and subscapular brown adipose tissues from F1, F2 and F3 female mice. ....  | 6 |
| Figure S3. Transgenerational effects of TBT on the body weights of F1, F2 and F3 mice.....                                                                       | 7 |
| Figure S4. Gene expression profiles of MSCs from F1, F2 and F3 female mice.....                                                                                  | 8 |
| Figure S5. Macroscopic phenotype of livers from F1 males and females. ....                                                                                       | 9 |

**Table S1. Number of litters per group**

|    | DMSO | ROSI | TBT 5.42 nM | TBT 54.2 nM | TBT 542 nM |
|----|------|------|-------------|-------------|------------|
| F1 | 5    | 4    | 4           | 4           | 4          |
| F2 | 5    | 4    | 4           | 5           | 4          |
| F3 | 4    | 4    | 4           | 4           | 4          |

**Table S2. Number of animals per group**

|         |    | DMSO | ROSI | TBT 5.42 nM | TBT 54.2 nM | TBT 542 nM |
|---------|----|------|------|-------------|-------------|------------|
| MALES   | F1 | 16   | 10   | 11          | 11          | 11         |
|         | F2 | 12   | 10   | 10          | 14          | 10         |
|         | F3 | 11   | 15   | 14          | 10          | 11         |
| FEMALES | F1 | 16   | 10   | 10          | 12          | 14         |
|         | F2 | 16   | 10   | 10          | 11          | 10         |
|         | F3 | 10   | 9    | 8           | 11          | 11         |

**Table S3. Primers used for QPCR analysis of gene expression**

| Gene           | Forward                  | Reverse                   |
|----------------|--------------------------|---------------------------|
| ACOX           | CAGGAAGAGCAAGGAAGTGG     | CCTTTCTGGCTGATCCCATA      |
| ALP            | GGGACTGGTACTCGGATAACGA   | CTGATATGCGATGTCCTTGCA     |
| $\beta$ -actin | GGCTGTATTCCCCTCCATCG     | CCAGTTGGTAACAATGCCATGT    |
| Fabp4          | AGCCCAACATGATCATCAGC     | TTTCCATCCCACCTTCTGCAC     |
| FATP           | GGCGTTTCGATGGTTATGTT     | CAGCTCGTCCATCACTAGCA      |
| Fsp27/CideC    | CTGGAGGAAGATGGCACAAT     | GGGCCACATCGATCTTCTTA      |
| FASN           | GTGTCCAAGAAGTGCAGCAA     | GGAGCGCAGGATAGACTCAC      |
| GyK            | AATCCGCTGGCTAAGAGACAACCT | CCCTGAAAATGCTGGAACGAAGTA  |
| LPL            | ACAACCAGGCCTTCGAGATT     | TCAGGCCAGCTGAAGTAGGA      |
| PPAR $\alpha$  | TTTCCCTGTTTGTGGCTGCTA    | CCCTCCTGCAACTTCTCAATG     |
| PPAR $\gamma$  | TGGGTGAAACTCTGGGAGATTC   | AATTTCTTGTGAAGTGCTCATAGGC |
| Pref-1         | CCTGGCTGTGTCAATGGAGT     | CTTGTGCTGGCAGTCCTTTC      |
| Runx2          | TTTAGGGCGCATTCCTCATC     | TGTCCTTGTGGATTAAGGACTTG   |
| SREBP1         | ACGAAGTGCACACAAAAGCA     | GCCAAAAGACAAGGGGCTAC      |
| Zfp423         | TGGACCACCGTGATCTTACA     | TCGTTCTCGAACGTCATCTG      |

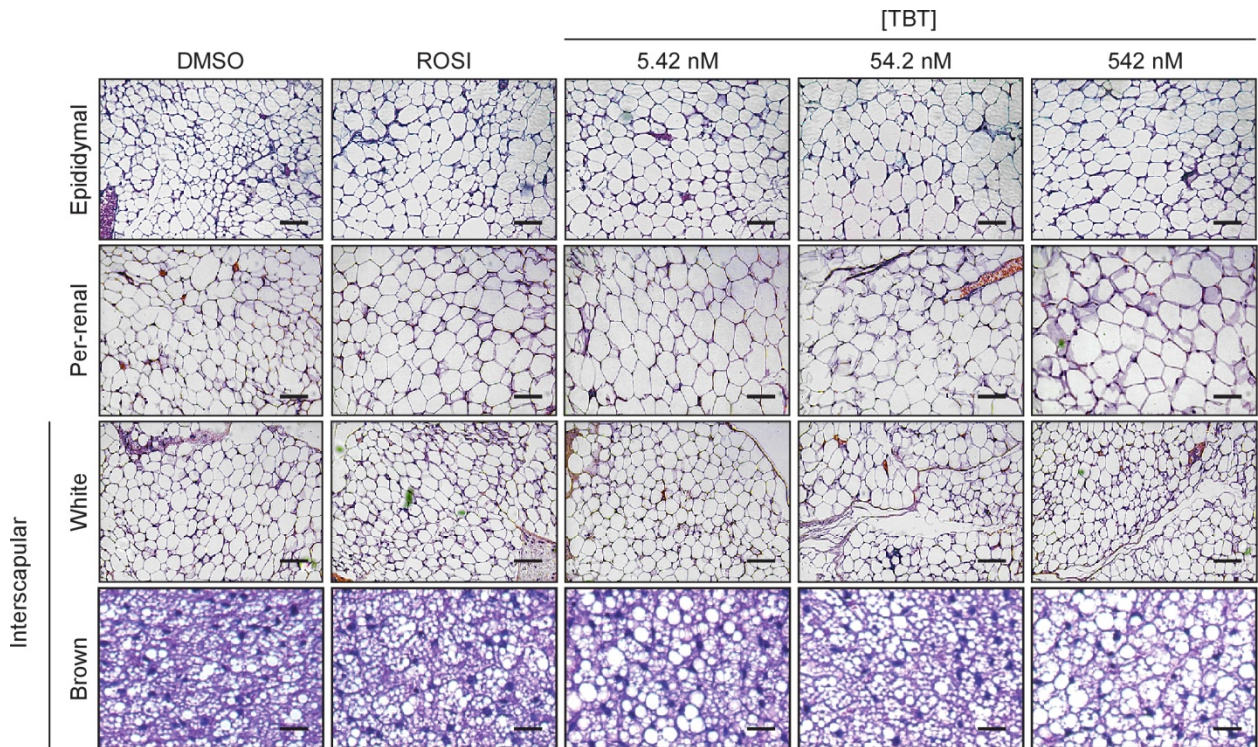

**Figure S1. Hematoxylin and eosin staining of sections of epididymal, peri-renal, interscapular white and interscapular brown adipose tissues from F1 males.**

Adipose depots were dissected, fixed with buffered 3.7% formaldehyde and then embedded, sectioned and stained with hematoxylin and eosin using standard methods in the UCI Pathology Core facility. The bar represents 50  $\mu\text{m}$  in each panel.

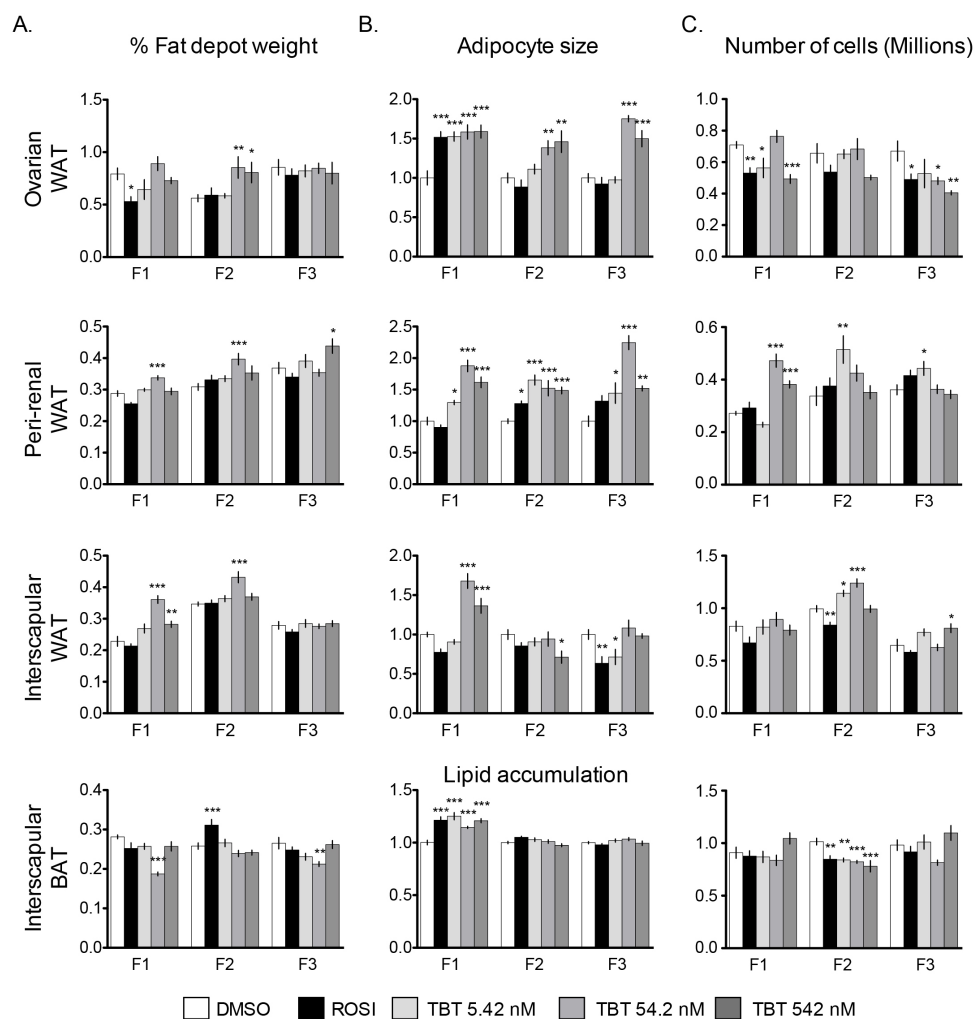

**Figure S2. Transgenerational effects of TBT on ovarian, perirenal, subscapular white and subscapular brown adipose tissues from F1, F2 and F3 female mice.**

A) Adipose tissue weights were represented as the percentage of total body weight. B) Relative adipocyte size in ovarian-, perirenal- and subscapular white- adipose tissues, and lipid accumulation for subscapular brown adipose tissue. C) Number of adipocytes per fat depot assayed by total DNA quantitation. All data are expressed as averages from 8-16 animals  $\pm$  SEM. For statistical analyses, samples were assayed with one-way ANOVA followed by Dunnett's posthoc test. \*,  $P < 0.05$ ; \*\*,  $P < 0.01$ ; \*\*\*,  $P < 0.001$ .

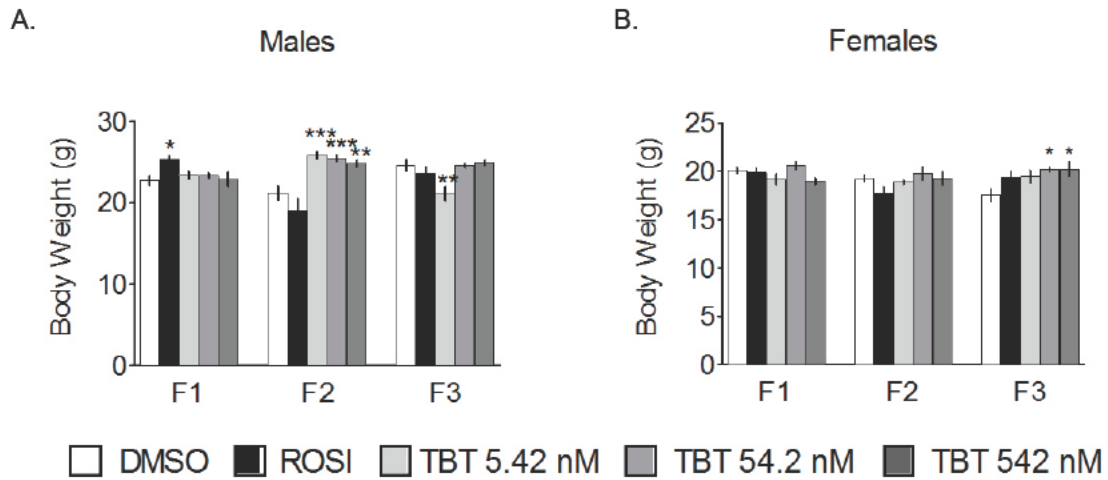

**Figure S3. Transgenerational effects of TBT on the body weights of F1, F2 and F3 mice.**

Total body weight was measured after 4 hours of fasting prior to euthanasia. A) male and B) female mice. For statistical analyses, samples were assayed with one-way ANOVA followed by Dunnett's posthoc test. \*,  $P < 0.05$ ; \*\*,  $P < 0.01$ ; \*\*\*,  $P < 0.001$ .

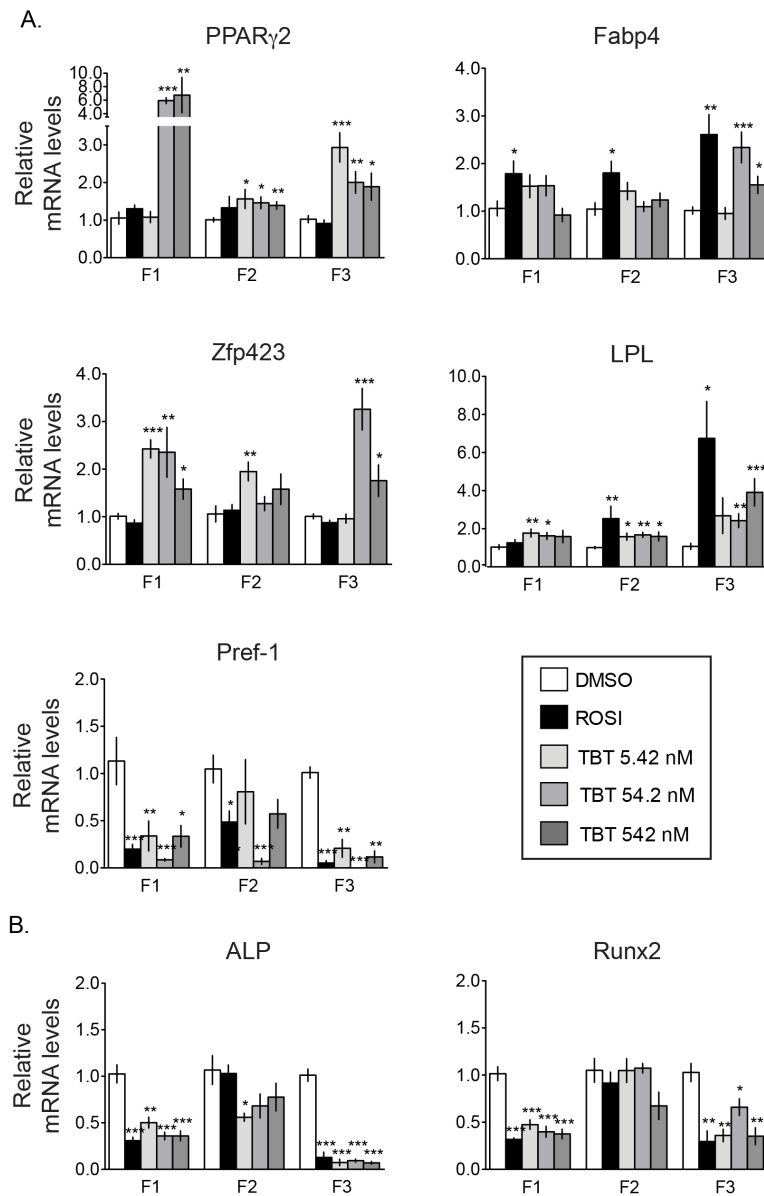

**Figure S4. Gene expression profiles of MSCs from F1, F2 and F3 female mice.**

The relative mRNA levels of specific transcripts for adipogenic (A) or osteogenic (B) differentiation were assayed by qPCR in undifferentiated MSCs, with the expression of each target gene normalized to  $\beta$ -Actin. All data is expressed as average fold change  $\pm$  SEM in 3 biological replicates run in duplicate. We used unpaired t-tests for statistical analyses. \*,  $P < 0.05$ ; \*\*,  $P < 0.01$ ; \*\*\*,  $P < 0.001$ .



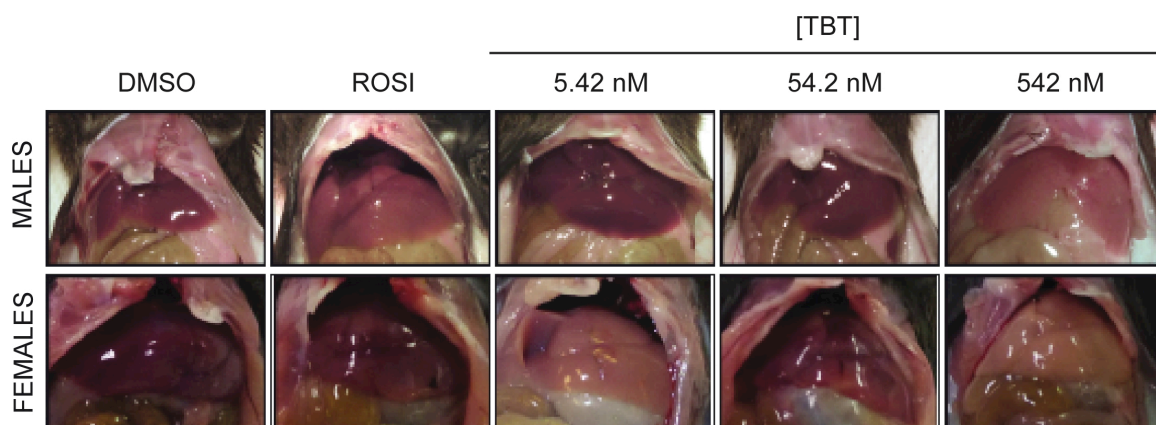

**Figure S5. Macroscopic phenotype of livers from F1 males and females.**

Livers of representative animals were photographed during dissection to illustrate the pale color of livers in treated animals.
